# Supplementary material
Source: MDPI journal article supplement (https://www.mdpi.com/2227-7102/13/2/130)
Supplement: s1 [file s1]

Table S1. Classification of publications included in review (N = 36).

|                                   | Validate Instruments | NON Validated Measures | Intervention Programs | Follow-Up | Results For Separate Conditions | Results For Separate Group (E.G., Gender, Grade Or Age, Subgroups) | Randomized Selection Of The Subjects | Randomization Of Group/Condition | Control Group/Condition | Validated Measures | Non Validated Measures |
|-----------------------------------|----------------------|------------------------|-----------------------|-----------|---------------------------------|--------------------------------------------------------------------|--------------------------------------|----------------------------------|-------------------------|--------------------|------------------------|
| Amado-Alonso Et Al. (2018)        | Yes                  | Yes                    | No                    | No        | No                              | Yes                                                                | Yes                                  | No                               | No                      | 0                  | 0                      |
| Arens Et Al. (2013)               | Yes                  | No                     | No                    | No        | No                              | Yes                                                                | No                                   | No                               | No                      | 1                  | 0                      |
| Ashrafi Et Al. (2020)             | Yes                  | Yes                    | No                    | No        | No                              | Yes                                                                | No                                   | No                               | No                      | 0                  | 0                      |
| Attar-Schwartz Et Al. (2019)      | Yes                  | Yes                    | No                    | No        | No                              | No                                                                 | No                                   | No                               | No                      | 0                  | 0                      |
| Baerveldt Et Al. (2014)           | No                   | Yes                    | No                    | Yes       | No                              | Yes                                                                | No                                   | No                               | No                      | 0                  | 1                      |
| Caprara Et Al. (2014)             | Yes                  | Yes                    | Yes                   | Yes       | Yes                             | Yes                                                                | No                                   | No                               | Yes                     | 0                  | 0                      |
| Chen Et Al. (2017)                | Yes                  | Yes                    | No                    | Yes       | No                              | No                                                                 | No                                   | No                               | No                      | 0                  | 0                      |
| Clemmensen Et Al. (2020)          | Yes                  | Yes                    | No                    | No        | No                              | Yes                                                                | No                                   | No                               | No                      | 0                  | 0                      |
| Coelho Et Al. (2017)              | Yes                  | No                     | Yes                   | Yes       | Yes                             | Yes                                                                | Yes                                  | Yes                              | Yes                     | 1                  | 0                      |
| Coelho-Sousa Et Al. (2017)        | Yes                  | No                     | Yes                   | Yes       | Yes                             | Yes                                                                | No                                   | No                               | Yes                     | 1                  | 0                      |
| Coyle Et Al. (2021)               | Yes                  | Yes                    | No                    | No        | No                              | No                                                                 | No                                   | No                               | No                      | 0                  | 0                      |
| De La Haye Et Al. (2017)          | No                   | Yes                    | No                    | No        | No                              | No                                                                 | No                                   | No                               | No                      | 0                  | 1                      |
| Delgado Et Al. (2019)             | Yes                  | No                     | No                    | No        | No                              | Yes                                                                | No                                   | No                               | No                      | 1                  | 0                      |
| Dorio Et Al. (2019)               | Yes                  | No                     | No                    | No        | No                              | Yes                                                                | No                                   | No                               | No                      | 1                  | 0                      |
| Dursley Et Al. (2015)             | Yes                  | No                     | No                    | No        | No                              | Yes                                                                | No                                   | No                               | No                      | 1                  | 0                      |
| Dvorsky Et Al. (2018)             | Yes                  | Yes                    | No                    | No        | No                              | No                                                                 | Yes                                  | No                               | No                      | 0                  | 0                      |
| Fairweather-Schmidt Et Al. (2015) | Yes                  | No                     | Yes                   | Yes       | Yes                             | Yes                                                                | No                                   | Yes                              | Yes                     | 1                  | 0                      |

|                             |     |     |     |     |     |     |     |     |     |    |   |
|-----------------------------|-----|-----|-----|-----|-----|-----|-----|-----|-----|----|---|
| Hoffmann Et Al. (2020)      | Yes | No  | 1  | 0 |
| Ickovics Et Al. (2014)      | Yes | Yes | No  | No  | No  | Yes | Yes | No  | No  | 0  | 0 |
| Layous Et Al. (2012)        | Yes | Yes | Yes | Yes | Yes | No  | No  | Yes | Yes | 0  | 0 |
| Long Et Al. (2012)          | Yes | No  | No  | No  | No  | Yes | No  | No  | No  | 1  | 0 |
| Makover Et Al. (2019)       | Yes | Yes | Yes | Yes | Yes | No  | No  | Yes | Yes | 0  | 0 |
| Murray Et Al. (2011)        | Yes | No  | No  | No  | No  | Yes | No  | No  | No  | 1  | 0 |
| Nitkowski Et Al. (2017)     | Yes | No  | Yes | Yes | Yes | Yes | No  | No  | Yes | 1  | 0 |
| Ogurlu Et Al. (2016)        | Yes | No  | No  | No  | No  | Yes | No  | No  | No  | 1  | 0 |
| Ojio Et Al. (2018)          | No  | Yes | Yes | Yes | No  | No  | No  | No  | No  | 0  | 1 |
| Olivier Et Al. (2017)       | Yes | Yes | No  | Yes | No  | No  | No  | No  | No  | 0  | 0 |
| Rothon Et Al. (2011)        | Yes | Yes | No  | No  | No  | No  | Yes | No  | No  | 0  | 0 |
| Rusby Et Al. (2013)         | No  | Yes | No  | Yes | Yes | Yes | Yes | Yes | Yes | 0  | 1 |
| Salazar-Ayala Et Al. (2021) | Yes | No  | 1  | 0 |
| Schaffhuser Et Al. (2017)   | Yes | Yes | No  | Yes | No  | Yes | No  | No  | No  | 0  | 0 |
| Schuster Et Al. (2012)      | No  | Yes | No  | No  | No  | Yes | Yes | No  | No  | 0  | 1 |
| Tomada Et Al. (2015)        | Yes | Yes | No  | No  | No  | Yes | No  | No  | Yes | 0  | 0 |
| Troop-Gordon Et Al. (2019)  | Yes | Yes | Yes | No  | Yes | Yes | No  | Yes | Yes | 0  | 0 |
| Vaz Et Al. (2014)           | Yes | Yes | No  | Yes | No  | Yes | No  | No  | No  | 0  | 0 |
| Vaz Et Al. (2015)           | Yes | Yes | No  | Yes | No  | Yes | No  | No  | No  | 0  | 0 |
|                             |     |     |     |     |     |     |     |     |     |    |   |
| Yes                         | 31  | 23  | 9   | 15  | 9   | 24  | 7   | 6   | 10  | 13 | 5 |
